# Supplementary material for: Luminescent lanthanide-based hybrid coatings deposited by atmospheric pressure plasma assisted chemical vapour deposition
Source: Royal Society of Chemistry journal article supplement (doi:10.1039/c1jm14659a), 2011-01-01
Supplement: c1jm14659a.pdf [file c1jm14659a.pdf]

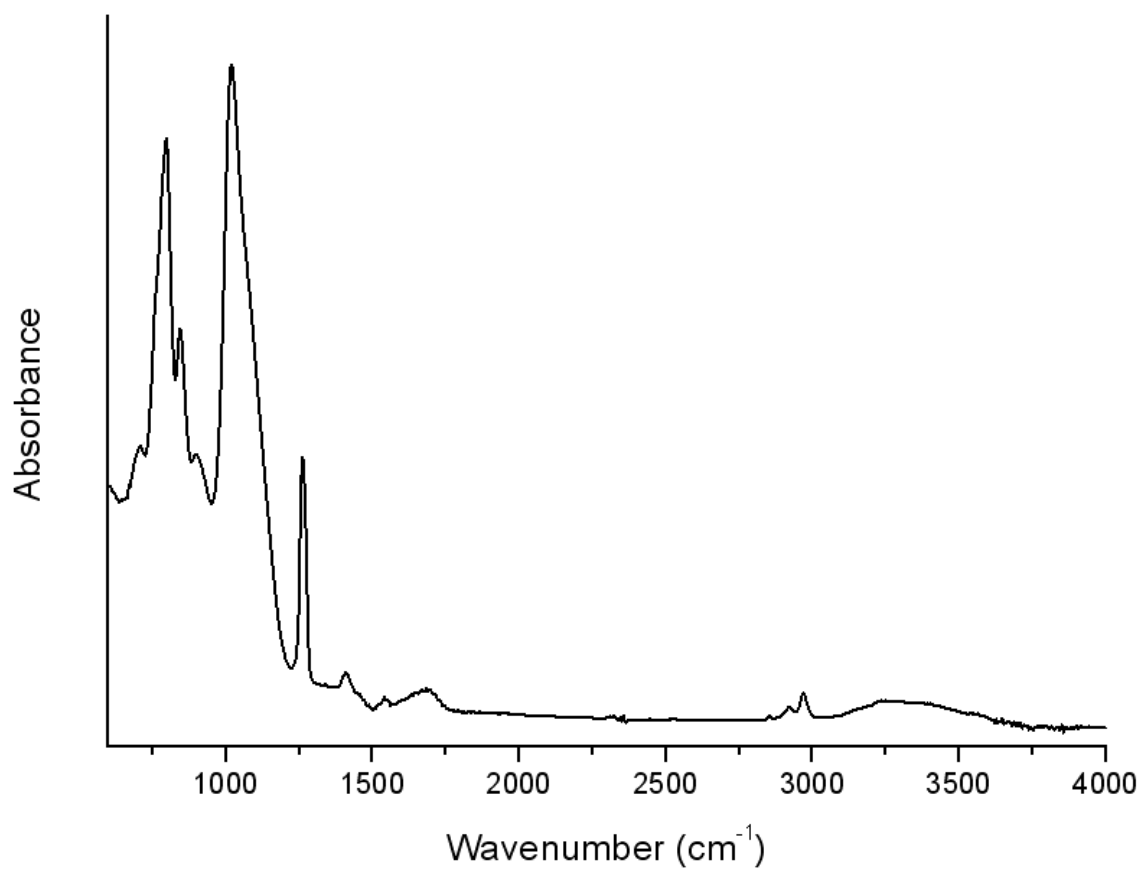

**Fig. 6** FTIR spectra of the hybrid coating produced from hexamethyldisiloxane and the luminescent coordination polymer.
